# Supplementary material
Source: publisher figshare collection journal article supplement (https://geolsoc.figshare.com/articles/dataset/_/3453437)
Supplement: Supplementary file 2 [file 1]

Appendix 2. Kolmogorov-Smirnoff (K-S) statistical test results.

**K-S P-values using error in the CDF**

|                     | Vardebukta Fm | Bravaiseberget Fm | De Geerdalen Fm (E) | De Geerdalen Fm (H) | De Geerdalen Fm (S) | Knorringfjellet Fm | Svenskoya Fm | Wilhelmoya Fm |
|---------------------|---------------|-------------------|---------------------|---------------------|---------------------|--------------------|--------------|---------------|
| Vardebukta Fm       |               | <b>0,139</b>      | 0,000               | 0,000               | 0,000               | 0,000              | 0,000        | 0,000         |
| Bravaiseberget Fm   | <b>0,139</b>  |                   | 0,000               | 0,000               | 0,000               | 0,000              | 0,000        | 0,000         |
| De Geerdalen Fm (E) | 0,000         | 0,000             |                     | <b>0,283</b>        | <b>0,090</b>        | 0,000              | 0,015        | 0,000         |
| De Geerdalen Fm (H) | 0,000         | 0,000             | <b>0,283</b>        |                     | <b>0,648</b>        | 0,000              | 0,002        | 0,000         |
| De Geerdalen Fm (S) | 0,000         | 0,000             | <b>0,090</b>        | <b>0,648</b>        |                     | 0,000              | 0,000        | 0,000         |
| Knorringfjellet Fm  | 0,000         | 0,000             | 0,000               | 0,000               | 0,000               |                    | 0,001        | <b>0,314</b>  |
| Svenskoya Fm        | 0,000         | 0,000             | 0,015               | 0,002               | 0,000               | 0,001              |              | <b>0,053</b>  |
| Wilhelmoya Fm       | 0,000         | 0,000             | 0,000               | 0,000               | 0,000               | <b>0,314</b>       | <b>0,053</b> |               |

**K-S P-values for no error**

|                     | Vardebukta Fm | Bravaiseberget Fm | De Geerdalen Fm (E) | De Geerdalen Fm (H) | De Geerdalen Fm (S) | Knorringfjellet Fm | Svenskoya Fm | Wilhelmoya Fm |
|---------------------|---------------|-------------------|---------------------|---------------------|---------------------|--------------------|--------------|---------------|
| Vardebukta Fm       |               | 0,116             | 0,000               | 0,000               | 0,000               | 0,000              | 0,000        | 0,000         |
| Bravaiseberget Fm   | 0,116         |                   | 0,000               | 0,000               | 0,000               | 0,000              | 0,000        | 0,000         |
| De Geerdalen Fm (E) | 0,000         | 0,000             |                     | 0,266               | 0,065               | 0,000              | 0,009        | 0,000         |
| De Geerdalen Fm (H) | 0,000         | 0,000             | 0,266               |                     | 0,549               | 0,000              | 0,002        | 0,000         |
| De Geerdalen Fm (S) | 0,000         | 0,000             | 0,065               | 0,549               |                     | 0,000              | 0,000        | 0,000         |
| Knorringfjellet Fm  | 0,000         | 0,000             | 0,000               | 0,000               | 0,000               |                    | 0,001        | 0,265         |
| Svenskoya Fm        | 0,000         | 0,000             | 0,009               | 0,002               | 0,000               | 0,001              |              | <b>0,020</b>  |
| Wilhelmoya Fm       | 0,000         | 0,000             | 0,000               | 0,000               | 0,000               | 0,265              | <b>0,020</b> |               |

**Average K-S P-values using Monte-Carlo**

|                     | Vardebukta Fm | Bravaiseberget Fm | De Geerdalen Fm (E) | De Geerdalen Fm (H) | De Geerdalen Fm (S) | Knorringfjellet Fm | Svenskoya Fm | Wilhelmoya Fm |
|---------------------|---------------|-------------------|---------------------|---------------------|---------------------|--------------------|--------------|---------------|
| Vardebukta Fm       |               | 0,098             | 0,000               | 0,000               | 0,000               | 0,000              | 0,000        | 0,000         |
| Bravaiseberget Fm   | 0,098         |                   | 0,000               | 0,000               | 0,000               | 0,000              | 0,000        | 0,000         |
| De Geerdalen Fm (E) | 0,000         | 0,000             |                     | 0,235               | 0,065               | 0,000              | 0,011        | 0,000         |
| De Geerdalen Fm (H) | 0,000         | 0,000             | 0,235               |                     | 0,463               | 0,000              | 0,001        | 0,000         |
| De Geerdalen Fm (S) | 0,000         | 0,000             | 0,065               | 0,463               |                     | 0,000              | 0,000        | 0,000         |
| Knorringfjellet Fm  | 0,000         | 0,000             | 0,000               | 0,000               | 0,000               |                    | 0,001        | 0,256         |
| Svenskoya Fm        | 0,000         | 0,000             | 0,011               | 0,001               | 0,000               | 0,001              |              |               |
| Wilhelmoya Fm       | 0,000         | 0,000             | 0,000               | 0,000               | 0,000               | 0,256              |              |               |

**D-values using error in the CDF**

|                     | Vardebukta Fm | Bravaiseberget Fm | De Geerdalen Fm (E) | De Geerdalen Fm (H) | De Geerdalen Fm (S) | Knorringfjellet Fm | Svenskoya Fm | Wilhelmoya Fm |
|---------------------|---------------|-------------------|---------------------|---------------------|---------------------|--------------------|--------------|---------------|
| Vardebukta Fm       |               | 0,154             | 0,725               | 0,770               | 0,791               | 0,391              | 0,523        | 0,430         |
| Bravaiseberget Fm   | 0,154         |                   | 0,776               | 0,827               | 0,846               | 0,446              | 0,572        | 0,483         |
| De Geerdalen Fm (E) | 0,725         | 0,776             |                     | 0,134               | 0,159               | 0,445              | 0,226        | 0,347         |
| De Geerdalen Fm (H) | 0,770         | 0,827             | 0,134               |                     | 0,090               | 0,507              | 0,261        | 0,416         |
| De Geerdalen Fm (S) | 0,791         | 0,846             | 0,159               | 0,090               |                     | 0,538              | 0,295        | 0,416         |
| Knorringfjellet Fm  | 0,391         | 0,446             | 0,445               | 0,507               | 0,538               |                    | 0,287        | 0,122         |
| Svenskoya Fm        | 0,523         | 0,572             | 0,226               | 0,261               | 0,295               | 0,287              |              | 0,175         |
| Wilhelmoya Fm       | 0,430         | 0,483             | 0,347               | 0,416               | 0,416               | 0,122              | 0,175        |               |

**D-values for no error**

|                     | Vardebukta Fm | Bravaiseberget Fm | De Geerdalen Fm (E) | De Geerdalen Fm (H) | De Geerdalen Fm (S) | Knorringfjellet Fm | Svenskoya Fm | Wilhelmoya Fm |
|---------------------|---------------|-------------------|---------------------|---------------------|---------------------|--------------------|--------------|---------------|
| Vardebukta Fm       |               | 0,159             | 0,724               | 0,773               | 0,800               | 0,409              | 0,527        | 0,434         |
| Bravaiseberget Fm   | 0,159         |                   | 0,780               | 0,836               | 0,855               | 0,458              | 0,575        | 0,501         |
| De Geerdalen Fm (E) | 0,724         | 0,780             |                     | 0,136               | 0,167               | 0,447              | 0,238        | 0,354         |
| De Geerdalen Fm (H) | 0,773         | 0,836             | 0,136               |                     | 0,097               | 0,519              | 0,263        | 0,433         |
| De Geerdalen Fm (S) | 0,800         | 0,855             | 0,167               | 0,097               |                     | 0,542              | 0,300        | 0,423         |
| Knorringfjellet Fm  | 0,409         | 0,458             | 0,447               | 0,519               | 0,542               |                    | 0,290        | 0,128         |
| Svenskoya Fm        | 0,527         | 0,575             | 0,238               | 0,263               | 0,300               | 0,290              |              | 0,196         |
| Wilhelmoya Fm       | 0,434         | 0,501             | 0,354               | 0,433               | 0,423               | 0,128              | 0,196        |               |

**Two standard deviations of P-values using Monte-Carlo**

|                     | Vardebukta Fm | Bravaiseberget Fm | De Geerdalen Fm (E) | De Geerdalen Fm (H) | De Geerdalen Fm (S) | Knorringfjellet Fm | Svenskoya Fm | Wilhelmoya Fm |
|---------------------|---------------|-------------------|---------------------|---------------------|---------------------|--------------------|--------------|---------------|
| Vardebukta Fm       |               | 0,046             | 0,000               | 0,000               | 0,000               | 0,000              | 0,000        | 0,000         |
| Bravaiseberget Fm   | 0,046         |                   | 0,000               | 0,000               | 0,000               | 0,000              | 0,000        | 0,000         |
| De Geerdalen Fm (E) | 0,000         | 0,000             |                     | 0,067               | 0,014               | 0,000              | 0,005        | 0,000         |
| De Geerdalen Fm (H) | 0,000         | 0,000             | 0,067               |                     | 0,105               | 0,000              | 0,001        | 0,000         |
| De Geerdalen Fm (S) | 0,000         | 0,000             | 0,014               | 0,105               |                     | 0,000              | 0,000        | 0,000         |
| Knorringfjellet Fm  | 0,000         | 0,000             | 0,000               | 0,000               | 0,000               |                    | 0,000        | 0,034         |
| Svenskoya Fm        | 0,000         | 0,000             | 0,005               | 0,001               | 0,000               | 0,000              |              |               |
| Wilhelmoya Fm       | 0,000         | 0,000             | 0,000               | 0,000               | 0,000               | 0,034              |              |               |

E: Edgeoya; H: Hopen; S: Spitsbergen; Fm: Formation.

P: expresses the probability that the observed D is due to random sampling error and not to a true difference in age populations.

CDF: Cumulative Distribution Function.

D: maximum probability difference between two CDFs.

Yellow bold fields indicating two samples that are unlikely from different populations.

Red bold fields indicate two samples that are unlikely originated from different populations when the K-S test used error in the CDF, however not using error in the CDF would indicate that the two samples are likely from different populations.
