# Supplementary material
Source: publisher figshare collection journal article supplement (https://geolsoc.figshare.com/articles/dataset/_/3453437)

$^{206}\text{Pb}/^{238}\text{U}$

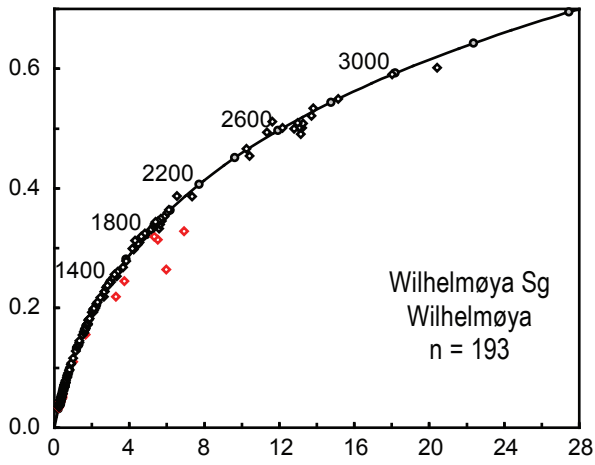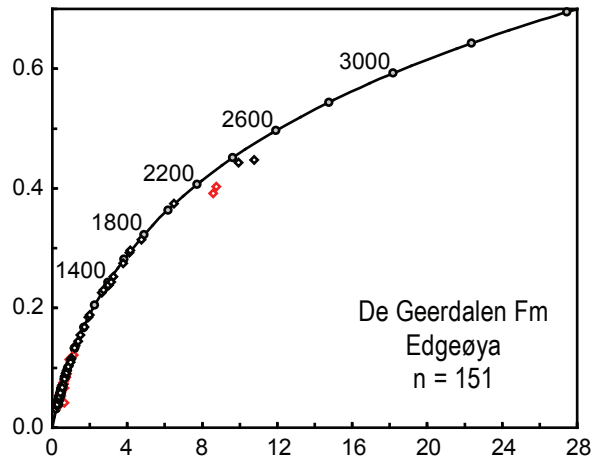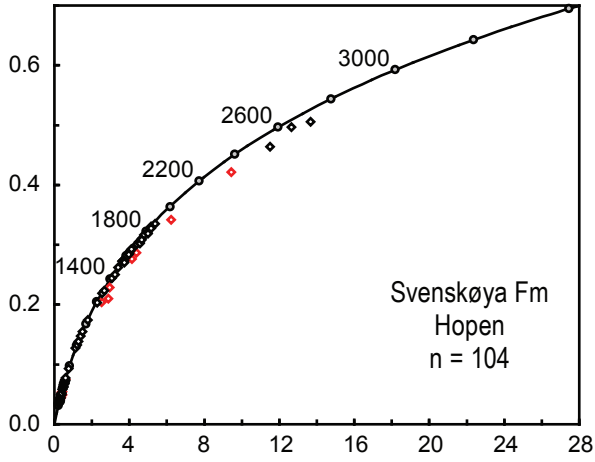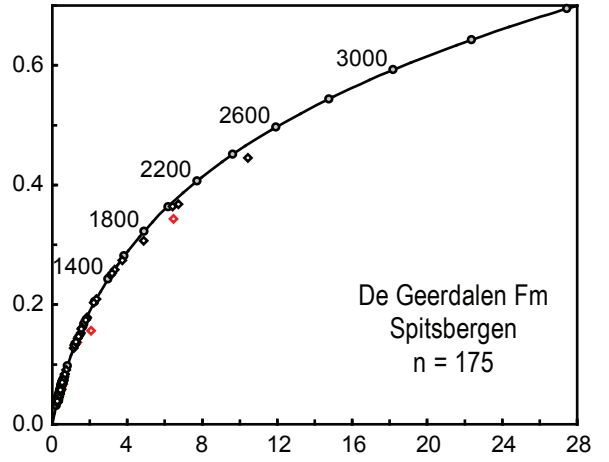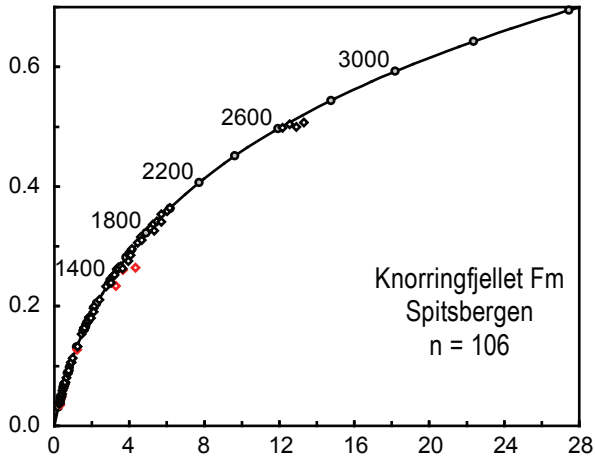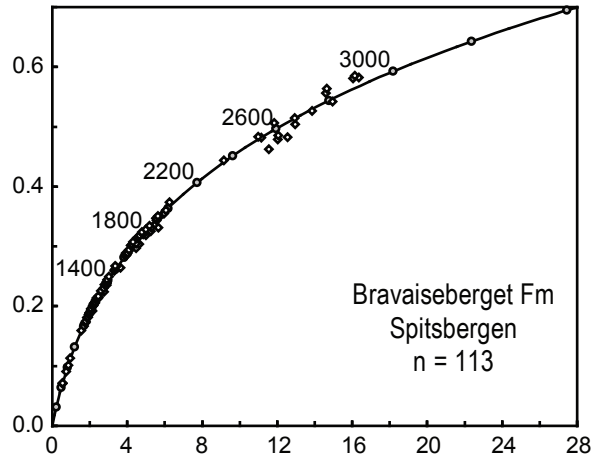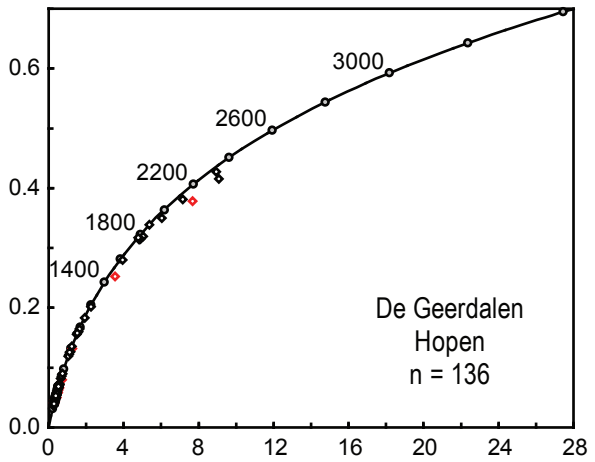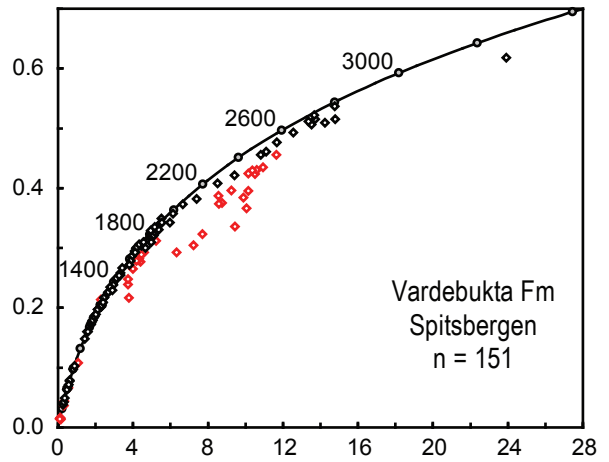

$^{207}\text{Pb}/^{235}\text{U}$

Supplement: Supplementary file 3 [file 1]
